# Supplementary material
Source: PubMed Central journal article supplement (PMC4403153)
Supplement: pnas.201504378SI.pdf [file pnas.201504378SI.pdf]

# Supporting Information

Castillo et al. 10.1073/pnas.1504378112

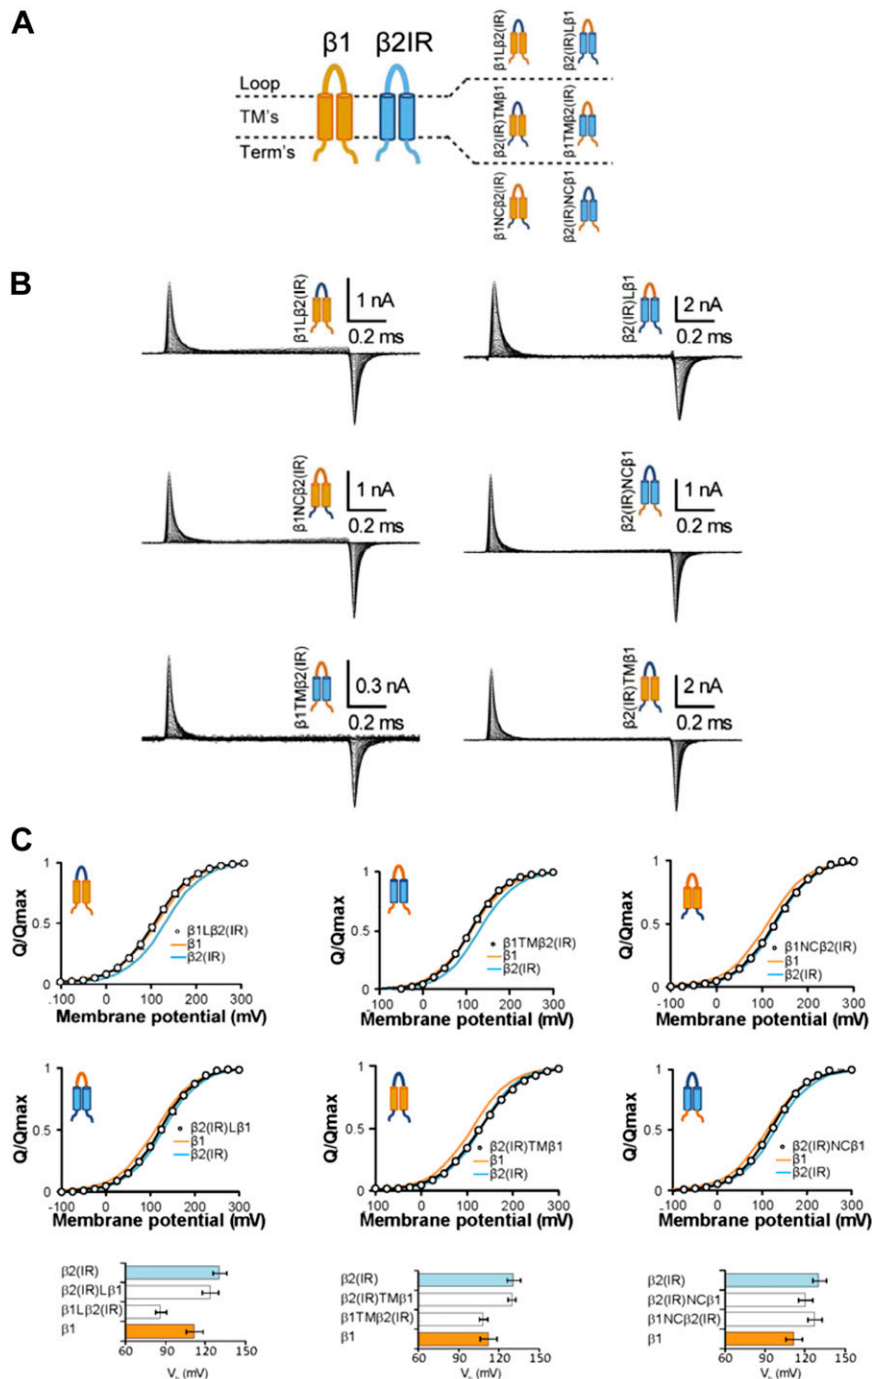

**Fig. S1.** Gating currents of BK channels coexpressed with chimeric  $\beta 1/\beta 2$ -subunits. (A) Topological model of chimeric  $\beta 1/\beta 2$ -subunit constructs, in which we exchanged the main regions of the auxiliary protein, namely the extracellular loop, transmembrane domains, and N and C termini. The  $\beta 1$ -subunit is shown in orange and  $\beta 2$  is in blue. (B) Representative recordings of BK channels with  $\beta 1/\beta 2$  chimeric constructs, as indicated. (C) Gating charge–voltage relationship for the indicated BK+ $\beta 1/\beta 2$  chimeric complexes. For comparison, all Q–V plots include the curve from channels formed by BK/ $\beta 1$  (orange) and BK/ $\beta 2$  (blue). (Lower) For all chimeras, quantification of  $V_{0.5}$  obtained from the Q–V curves is presented (mean  $\pm$  SEM).

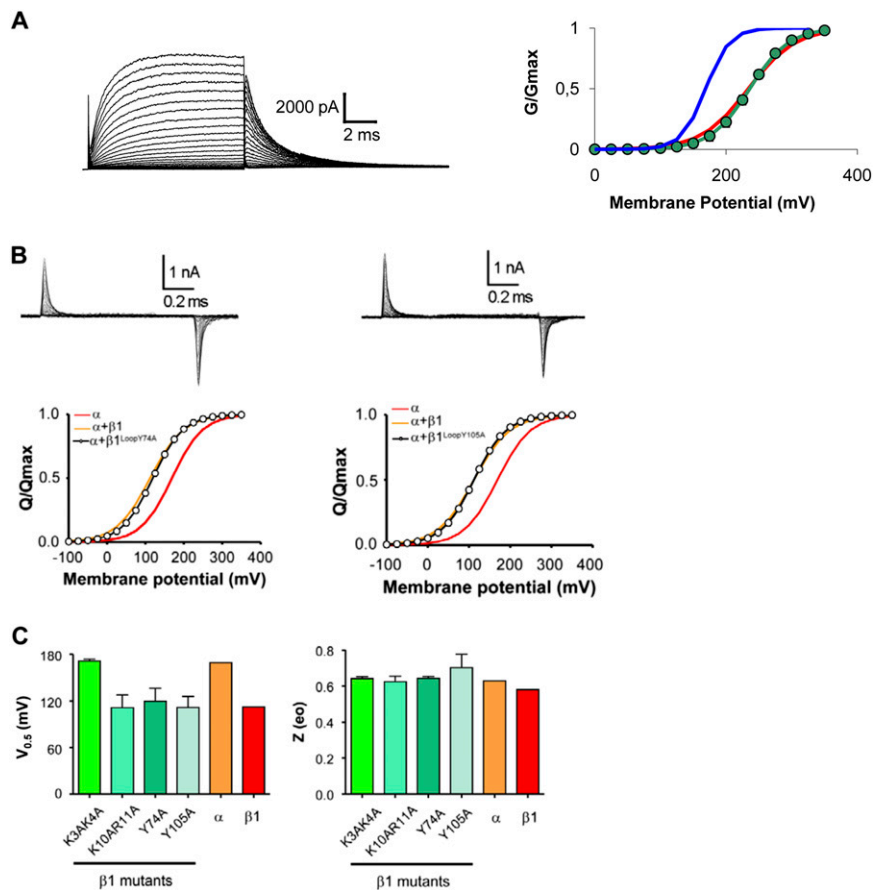

**Fig. S2.** G–V and Q–V relationships for BK channels coexpressed with different  $\beta 1$ -mutants. (A, Left) Representative macroscopic current recordings from the  $\alpha + \beta 1_{N\_K3AK4A}$  mutant in 0  $Ca^{2+}$  and 1 mM  $K^+$ . (Right) G–V curves from tail currents, comparing the G–V relationship between  $\alpha$  (blue) and  $\alpha + \beta 1$  (red) with the mutant  $\alpha + \beta 1_{N\_K3AK4A}$  channel (green). (B, Top) Representative  $I_g$  recordings  $\alpha + \beta 1_{Y74A}$  (Right) and  $\alpha + \beta 1_{Y105A}$  channels (Left) measured in 0  $Ca^{2+}$ . (Bottom) Gating charge–voltage relationship for the  $\alpha + \beta 1_{Y74A}$  (Right) and  $\alpha + \beta 1_{Y105A}$  (Left) channels. Gating currents were elicited by 1-ms pulses between  $-90$  and  $350$  mV in increments of  $20$  mV. For comparison, Q–V plots include the curve from channels formed by  $\alpha$  (red) and  $\alpha + \beta 1$  (orange). (C) Quantification of  $V_{0.5}$  and  $z$  values obtained from the Q–V curves (mean  $\pm$  SEM). A nonparametric  $t$  test was used to compare statistical significance between wild-type  $\beta 1$  and the mutant  $\beta$ -subunits. For comparison, plots include the quantification of channels formed by  $\alpha$  (red) and  $\alpha + \beta 1$  (orange).

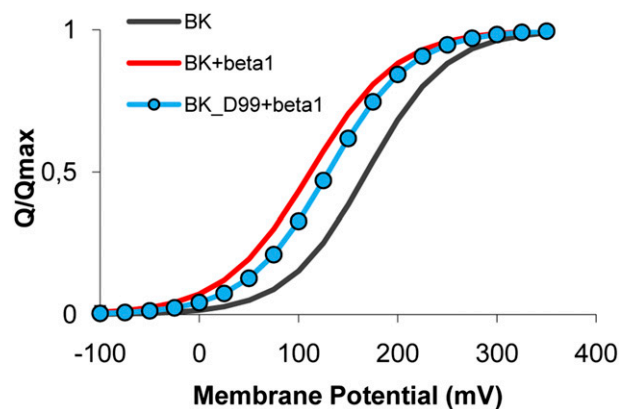

**Fig. S3.**  $Mg^{2+}$ -coordinating residue in BK partially modifying Q–V relationships. Q–V relationships for the  $BK^{S0\_D99A}$  mutant coexpressed with  $\beta 1$  (blue;  $n = 8$ ) compared with BK alone (black) and BK+ $\beta 1$  (red). Two-way ANOVA was used to compare statistical significance between BK wild type coexpressed with  $\beta 1$  and the BK mutant protein coexpressed with the auxiliary subunit.

**Table S1. Summary of gating properties for  $\beta 1/\beta 2$  chimeras**

| BK channel type             | $V_{0.5}$ , mV | $z$ , $e_0$     | $n$ |
|-----------------------------|----------------|-----------------|-----|
| $\alpha + \beta 1^*$        | $112 \pm 5$    | $0.58 \pm 0.02$ | 8   |
| $\alpha + \beta 2^*$        | $130 \pm 7$    | $0.61 \pm 0.02$ | 7   |
| $\alpha + \beta 1L\beta 2$  | $107 \pm 9$    | $0.61 \pm 0.06$ | 8   |
| $\alpha + \beta 2L\beta 1$  | $123 \pm 6$    | $0.62 \pm 0.01$ | 10  |
| $\alpha + \beta 1TM\beta 2$ | $108 \pm 3$    | $0.65 \pm 0.02$ | 8   |
| $\alpha + \beta 2TM\beta 1$ | $129 \pm 3$    | $0.56 \pm 0.01$ | 9   |
| $\alpha + \beta 1NC\beta 2$ | $127 \pm 5$    | $0.60 \pm 0.03$ | 7   |
| $\alpha + \beta 2NC\beta 1$ | $120 \pm 5$    | $0.64 \pm 0.06$ | 5   |

\* $V_{0.5}$  and  $z$  values were determined as in Contreras et al. (1).

1. Contreras GF, Neely A, Alvarez O, Gonzalez C, Latorre R (2012) Modulation of BK channel voltage gating by different auxiliary  $\beta$  subunits. *Proc Natl Acad Sci USA* 109(46):18991–18996.

**Table S2. Summary of gating properties for  $\beta 1/\beta 3$  chimeras**

| BK channel type             | $V_{0.5}$ , mV | $z$ , $e_0$     | $n$ |
|-----------------------------|----------------|-----------------|-----|
| $\alpha^*$                  | $169 \pm 12$   | $0.63 \pm 0.06$ | 14  |
| $\alpha + \beta 1^*$        | $112 \pm 5$    | $0.58 \pm 0.02$ | 8   |
| $\alpha + \beta 3^*$        | $189 \pm 4$    | $0.56 \pm 0.02$ | 8   |
| $\alpha + \beta 1L\beta 3$  | $119 \pm 1$    | $0.67 \pm 0.01$ | 6   |
| $\alpha + \beta 3L\beta 1$  | $174 \pm 14$   | $0.61 \pm 0.01$ | 9   |
| $\alpha + \beta 1TM\beta 3$ | $116 \pm 6$    | $0.68 \pm 0.02$ | 7   |
| $\alpha + \beta 3TM\beta 1$ | $165 \pm 8$    | $0.64 \pm 0.02$ | 8   |
| $\alpha + \beta 1NC\beta 3$ | $171 \pm 2$    | $0.67 \pm 0.01$ | 10  |
| $\alpha + \beta 3NC\beta 1$ | $112 \pm 5$    | $0.57 \pm 0.01$ | 8   |
| $\alpha + \beta 1N\beta 3$  | $177 \pm 2$    | $0.63 \pm 0.01$ | 7   |
| $\alpha + \beta 3C\beta 1$  | $177 \pm 2$    | $0.64 \pm 0.02$ | 7   |
| $\alpha + \beta 3N\beta 1$  | $129 \pm 4$    | $0.64 \pm 0.02$ | 6   |

\* $V_{0.5}$  and  $z$  values were determined as in Contreras et al. (1).

1. Contreras GF, Neely A, Alvarez O, Gonzalez C, Latorre R (2012) Modulation of BK channel voltage gating by different auxiliary  $\beta$  subunits. *Proc Natl Acad Sci USA* 109(46):18991–18996.

**Table S3. Summary of  $\Delta\Delta G$  for BK ( $\beta 1/\beta 3$ ) channels**

| BK channel type             | $\Delta G$ , kcal/mol | $\Delta\Delta G$ , kcal/mol |
|-----------------------------|-----------------------|-----------------------------|
| $\alpha$                    | $2.4 \pm 0.1$         | $1.0 \pm 0.2^{**}$          |
| $\alpha + \beta 1$          | $1.5 \pm 0.1$         | 0                           |
| $\alpha + \beta 1L\beta 3$  | $1.8 \pm 0.1$         | $0.3 \pm 0.2$               |
| $\alpha + \beta 3L\beta 1$  | $2.4 \pm 0.7$         | $0.9 \pm 0.7$               |
| $\alpha + \beta 1TM\beta 3$ | $1.8 \pm 0.2$         | $0.3 \pm 0.2$               |
| $\alpha + \beta 3TM\beta 1$ | $2.4 \pm 0.4$         | $1.0 \pm 0.4^{**}$          |
| $\alpha + \beta 1NC\beta 3$ | $2.6 \pm 0.1$         | $1.1 \pm 0.2^*$             |
| $\alpha + \beta 3NC\beta 1$ | $1.5 \pm 0.2$         | $0.0 \pm 0.3$               |
| $\alpha + \beta 1N\beta 3$  | $2.6 \pm 0.1$         | $1.1 \pm 0.2^*$             |
| $\alpha + \beta 3C\beta 1$  | $2.6 \pm 0.2$         | $1.1 \pm 0.2^*$             |
| $\alpha + \beta 3N\beta 1$  | $1.9 \pm 0.2$         | $0.4 \pm 0.2$               |

Free energy was calculated as  $\Delta G = zFV_{0.5}$ , with the  $z$  and  $V_{0.5}$  values determined from Q–V relationships. Changes in free energy were determined by  $\Delta\Delta G = F(z_i V_{0.5 i} - z_0 V_{0.50})$ , with  $z_0$  and  $V_{0.50}$  as the values for  $\alpha + \beta 1$  (reference value) and  $z_i$  and  $V_{0.5 i}$  as the values for the other  $\alpha + \beta$  combinations.

\*\* $P < 0.01$ , \* $P < 0.05$ , nonparametric pairwise Wilcoxon test.

**Table S4. Summary of gating properties for mutant channels**

| BK channel type                          | $V_{0.5}$ , mV | $z$ , $e_0$     | $n$ |
|------------------------------------------|----------------|-----------------|-----|
| $\alpha^*$                               | $169 \pm 3$    | $0.63 \pm 0.06$ | 14  |
| $\alpha + \beta 1^*$                     | $112 \pm 5$    | $0.58 \pm 0.02$ | 8   |
| $\alpha + \beta 1^{N_{K3AK4A}}$          | $171 \pm 3$    | $0.64 \pm 0.01$ | 16  |
| $\alpha + \beta 1^{N_{K10AR11A}}$        | $111 \pm 18$   | $0.62 \pm 0.04$ | 5   |
| $\alpha + \beta 1^{\text{Loop}_{Y74A}}$  | $119 \pm 19$   | $0.64 \pm 0.01$ | 4   |
| $\alpha + \beta 1^{\text{Loop}_{Y105A}}$ | $111 \pm 16$   | $0.70 \pm 0.09$ | 4   |
| $\alpha^{D99A} + \beta 1$                | $130 \pm 3$    | $0.61 \pm 0.02$ | 6   |

\* $V_{0.5}$  and  $z$  values were determined as in Contreras et al. (1).

1. Contreras GF, Neely A, Alvarez O, Gonzalez C, Latorre R (2012) Modulation of BK channel voltage gating by different auxiliary  $\beta$  subunits. *Proc Natl Acad Sci USA* 109(46):18991–18996.

**Table S5. Summary of  $\Delta\Delta G$  for BK/ $\beta 1^{\text{mut}}$  channels**

| BK channel type                          | $\Delta G$ , kcal/mol | $\Delta\Delta G$ , kcal/mol |
|------------------------------------------|-----------------------|-----------------------------|
| $\alpha + \beta 1$                       | $1.5 \pm 0.1$         | 0                           |
| $\alpha + \beta 1^{N_{K3AK4A}}$          | $2.5 \pm 0.2$         | $1.1 \pm 0.2^{**}$          |
| $\alpha + \beta 1^{N_{K10AR11A}}$        | $1.6 \pm 0.5$         | $0.2 \pm 0.5$               |
| $\alpha + \beta 1^{\text{Loop}_{Y74A}}$  | $1.8 \pm 0.5$         | $0.3 \pm 0.6$               |
| $\alpha + \beta 1^{\text{Loop}_{Y105A}}$ | $1.8 \pm 0.7$         | $0.4 \pm 0.7$               |

Free energy was calculated as  $\Delta G = zFV_{0.5}$ , with the  $z$  and  $V_{0.5}$  values determined from Q–V relationships. Changes in free energy were determined by  $\Delta\Delta G = F(z_i V_{0.5 i} - z_0 V_{0.50})$ , with  $z_0$  and  $V_{0.50}$  as the values for  $\alpha + \beta 1$  (reference value) and  $z_i$  and  $V_{0.5 i}$  as the values for the other  $\alpha + \beta$  combinations.

\*\* $p < 0.01$ , nonparametric pairwise Wilcoxon test.
